# Supplementary material for: Is there an agreement between self-reported medical diagnosis in the CARTaGENE cohort and the Québec administrative health databases?
Source: PubMed Central journal article supplement (PMC7473265; doi:10.23889/ijpds.v5i1.1155), 2020-03-26
Supplement: ijpds-05-1155-s001.pdf [file ijpds-05-1155-s001.pdf]

Table 1. Characteristics of participants (N=19,996), first CARTaGENE wave (2009-2010)

| Characteristics                     | N (%)          |
|-------------------------------------|----------------|
| Sex                                 |                |
| Men                                 | 9,686 (48.4%)  |
| Women                               | 10,310 (51.6%) |
| Age                                 |                |
| 40-49                               | 6,935 (34.7%)  |
| 50-59                               | 7,602 (38.0%)  |
| 60-69                               | 5,459 (27.3%)  |
| Region                              |                |
| Montréal                            | 15,227 (76.2%) |
| Saguenay                            | 799 (4.0%)     |
| Québec city                         | 3,045 (15.2%)  |
| Sherbrooke                          | 925 (4.6%)     |
| Education                           |                |
| High school or less                 | 5,185 (25.9)   |
| College/vocational training         | 6,325 (31.6%)  |
| University or more                  | 8,357 (41.8%)  |
| Missing                             | 129 (0.6%)     |
| Income quintiles                    |                |
| Lowest (24999\$ and lesss)          | 2,465 (12.3%)  |
| Low-middle (25 000\$ to 49 999\$)   | 4,361 (21.8%)  |
| Middle (50 000\$ to 74 999\$)       | 4,057 (20.3%)  |
| Upper-middle (75 000\$ to 99 999\$) | 5,831 (29.2%)  |
| Highest (100 000\$ and up)          | 1,961 (9.8%)   |
| Missing                             | 1,321 (6.6%)   |
| Health care utilization             |                |
| < 20 claims in last 3 years         | 8,837 (44.2%)  |
| ≥ 20 claims in last 3 years         | 11,159 (55.8%) |
| Charlson comorbidity index (CCI)*   |                |
| 0                                   | 15,159 (75.8%) |
| 1                                   | 2,802 (14.0%)  |
| 2                                   | 1,131 (5.7%)   |
| 3 to 12                             | 904 (4.5%)     |

\*CCI is derived from AHD

Table 2. Morbidity frequencies and measures of agreement by diagnosis, (N=19,996), CARTaGENE

| Diseases              | Concordant cases* | Frequency (%) |       | Sensitivity (%)<br>(95% CI) | Specificity (%)<br>(95% CI) | PPV (%)<br>(95% CI)    | Kappa<br>(95% CI)   |
|-----------------------|-------------------|---------------|-------|-----------------------------|-----------------------------|------------------------|---------------------|
|                       |                   | CaG           | AHD   |                             |                             |                        |                     |
| Chronic diseases      |                   |               |       |                             |                             |                        |                     |
| Hypertension          | 3,660             | 25.00         | 22.80 | 73.83<br>(72.15-75.51)      | 94.15<br>(92.25-96.05)      | 80.79<br>(79.03-82.55) | 0.70<br>(0.69-0.71) |
| OA                    | 1,554             | 16.10         | 20.50 | 38.48<br>(37.26-39.70)      | 89.70<br>(87.84-91.56)      | 49.05<br>(47.68-50.42) | 0.31<br>(0.29-0.32) |
| Depression            | 1,717             | 16.70         | 18.40 | 51.16<br>(49.76-52.56)      | 91.59<br>(89.71-93.47)      | 57.83<br>(56.34-59.32) | 0.45<br>(0.43-0.47) |
| Diabetes              | 1,338             | 7.60          | 8.00  | 85.06<br>(83.25-86.87)      | 99.15<br>(97.2-100)         | 89.74<br>(87.88-91.6)  | 0.86<br>(0.85-0.88) |
| COPD                  | 340               | 5.69          | 7.62  | 22.46<br>(21.53-23.39)      | 95.69<br>(93.77-97.61)      | 30.06<br>(28.99-31.13) | 0.21<br>(0.18-0.23) |
| Hypothyroidism        | 932               | 7.10          | 7.60  | 61.52<br>(59.98-63.06)      | 97.4<br>(95.47-99.33)       | 66.1<br>(64.51-67.69)  | 0.61<br>(0.59-0.63) |
| Asthma                | 991               | 13.00         | 6.40  | 78.15<br>(76.42-79.88)      | 91.43<br>(89.56-93.3)       | 38.31<br>(37.1-39.52)  | 0.47<br>(0.45-0.49) |
| Chronic renal failure | 44                | 0.31          | 3.30  | 5.09 (4.65-5.53)            | 99.91<br>(97.95-100)        | 72.13<br>(70.47-73.79) | 0.09<br>(0.07-0.12) |
| Stroke                | 170               | 1.65          | 2.06  | 41.36<br>(40.10-42.62)      | 99.18<br>(97.23-100)        | 51.67<br>(50.26-53.08) | 0.45<br>(0.40-0.49) |
| IBS                   | 170               | 4.48          | 1.82  | 46.96<br>(45.62-48.3)       | 96.31<br>(94.39-98.23)      | 19.10<br>(18.24-19.96) | 0.25<br>(0.22-0.29) |
| MI                    | 296               | 2.81          | 1.68  | 88.62<br>(86.77-90.47)      | 98.66<br>(96.71-100)        | 52.95<br>(51.52-54.38) | 0.66<br>(0.62-0.69) |
| Crohn's disease       | 103               | 0.60          | 1.40  | 38.01<br>(36.80-39.22)      | 99.91<br>(97.95-100)        | 85.83<br>(84.01-87.65) | 0.52<br>(0.46-0.58) |
| RA                    | 123               | 2.90          | 0.88  | 71.10<br>(69.45-72.75)      | 97.74<br>(95.8-99.68)       | 21.81<br>(20.89-22.73) | 0.33<br>(0.28-0.37) |
| Schizophrenia         | 58                | 0.38          | 0.82  | 35.37<br>(34.20-36.54)      | 99.91<br>(97.95-100)        | 77.33<br>(75.61-79.05) | 0.48<br>(0.41-0.56) |
| MS                    | 74                | 0.41          | 0.66  | 56.49<br>(55.02-57.96)      | 99.96<br>(98-100)           | 90.24<br>(88.38-92.1)  | 0.69<br>(0.62-0.76) |
| Epilepsy              | 65                | 0.56          | 0.55  | 59.63<br>(58.12-61.14)      | 99.76<br>(97.80-100)        | 58.04<br>(56.55-59.53) | 0.59<br>(0.51-0.66) |
| Cirrhosis             | 26                | 0.28          | 0.41  | 31.71<br>(30.61-32.81)      | 99.85<br>(97.89-100)        | 47.27<br>(45.92-48.62) | 0.38<br>(0.27-0.48) |
| Parkinson's disease   | 24                | 0.12          | 0.32  | 38.10<br>(36.89-39.31)      | 100<br>(98.04-100)          | 100<br>(98.04-100)     | 0.55<br>(0.43-0.68) |
| SLE                   | 23                | 0.28          | 0.32  | 35.94<br>(34.76-37.12)      | 99.84<br>(97.88-100)        | 41.82<br>(40.55-43.09) | 0.39<br>(0.27-0.5)  |
| Cancers               |                   |               |       |                             |                             |                        |                     |
| Breast                | 327               | 1.76          | 1.90  | 86.28<br>(84.46-88.1)       | 99.88<br>(97.92-100)        | 93.43<br>(91.54-95.32) | 0.90<br>(0.87-0.92) |
| Prostate              | 169               | 0.89          | 1.26  | 67.6<br>(65.99-69.21)       | 99.95<br>(97.99-100)        | 94.94<br>(93.03-96.85) | 0.79<br>(0.75-0.83) |
| Melanoma              | 72                | 1.67          | 0.80  | 45.28<br>(43.96-46.6)       | 98.68<br>(96.73-100)        | 21.62<br>(20.71-22.53) | 0.29<br>(0.23-0.34) |

|                        |    |      |      |                        |                      |                        |                     |
|------------------------|----|------|------|------------------------|----------------------|------------------------|---------------------|
| Colon                  | 61 | 0.42 | 0.70 | 43.57<br>(42.28-44.86) | 99.89<br>(97.93-100) | 73.49<br>(71.81-75.17) | 0.55<br>(0.47-0.62) |
| Non-Hodgkin's lymphoma | 39 | 0.22 | 0.53 | 36.79<br>(35.6-37.98)  | 99.97<br>(98.01-100) | 88.64<br>(86.79-90.49) | 0.52<br>(0.42-0.62) |
| Lung                   | 45 | 0.27 | 0.48 | 47.37<br>(46.02-48.72) | 99.96<br>(98-100)    | 84.91<br>(83.1-86.72)  | 0.61<br>(0.51-0.7)  |
| Cervical               | 21 | 0.66 | 0.38 | 28 (26.96-29.04)       | 99.45<br>(97.5-100)  | 16.03<br>(15.25-16.81) | 0.20<br>(0.13-0.27) |
| Bladder                | 40 | 0.22 | 0.34 | 58.82<br>(57.32-60.32) | 99.98<br>(98.02-100) | 93.02<br>(91.13-94.91) | 0.72<br>(0.63-0.82) |
| Thyroid                | 43 | 0.27 | 0.30 | 71.67<br>(70.01-73.33) | 99.94<br>(97.98-100) | 79.63<br>(77.88-81.38) | 0.75<br>(0.67-0.84) |
| Kidney                 | 31 | 0.17 | 0.27 | 57.41<br>(55.92-58.9)  | 99.98<br>(98.02-100) | 91.18<br>(89.31-93.05) | 0.70<br>(0.6-0.81)  |
| Rectum                 | 12 | 0.08 | 0.25 | 24 (23.04-24.96)       | 99.98<br>(98.02-100) | 75<br>(73.30-76.70)    | 0.36<br>(0.21-0.51) |
| Uterus                 | 18 | 0.39 | 0.19 | 47.37<br>(46.02-48.72) | 99.7<br>(97.74-100)  | 23.08<br>(22.14-24.02) | 0.31<br>(0.20-0.42) |

\* Concordant cases represent the double positive for self-reported CaG diagnosis and AHD (consult text for specific definition).

CaG: Self-reported diagnosis in the CARTaGENE cohort; ADH: Administrative health data; CI: Confidence Interval; COPD: Chronic obstructive pulmonary disease; IBS: Irritable bowel syndrome; MS: Multiple sclerosis; MI: Myocardial infarction; OA: Osteoarthritis; RA: Rheumatoid arthritis; SLE: Systemic lupus erythematosus.

Table 3. Fit statistics for the complete logistic models where concordant cases were higher than 30, CARTaGENE

| Diseases               | Pseudo-R <sup>2</sup> | Model Wald p | Sex p   | Age groups p | Regions p | Education p | Income quintiles p | Heavy health utilization p | CCI* p  |
|------------------------|-----------------------|--------------|---------|--------------|-----------|-------------|--------------------|----------------------------|---------|
| Chronic diseases       |                       |              |         |              |           |             |                    |                            |         |
| Hypertension           | 0.0246                | <0.0001      | <0.0001 | <0.0001      | 0.0254    | 0.1090      | <0.0001            | <0.0001                    | <0.0001 |
| OA                     | 0.0561                | <0.0001      | <0.0001 | <0.0001      | 0.001     | 0.0033      | 0.0003             | <0.0001                    | 0.13    |
| Depression             | 0.0282                | <0.0001      | <0.0001 | 0.0004       | 0.0002    | 0.06        | <0.0001            | <0.0001                    | 0.86    |
| Diabetes               | 0.0432                | <0.0001      | <0.0001 | <0.0001      | 0.3250    | 0.3736      | 0.3928             | 0.0003                     | <0.0001 |
| COPD                   | 0.0358                | <0.0001      | <0.0001 | 0.64         | 0.0031    | <0.0001     | <0.0001            | <0.0001                    | <0.0001 |
| Hypothyroidism         | 0.0572                | <0.0001      | <0.0001 | <0.0001      | 0.33      | 0.72        | 0.34               | <0.0001                    | 0.18    |
| Asthma                 | 0.0196                | <0.0001      | <0.0001 | <0.0001      | 0.0003    | 0.79        | <0.0001            | <0.0001                    | <0.0001 |
| Chronic renal failure  | 0.0649                | <0.0001      | <0.0001 | 0.0236       | 0.0216    | 0.0410      | 0.0120             | <0.0001                    | <0.0001 |
| Stroke                 | 0.0679                | <0.0001      | 0.0114  | <0.0001      | 0.07      | 0.81        | 0.0146             | <0.0001                    | <0.0001 |
| IBS                    | 0.0439                | <0.0001      | <0.0001 | 0.09         | 0.27      | 0.41        | 0.17               | <0.0001                    | 0.82    |
| MI                     | 0.1278                | <0.0001      | <0.0001 | <0.0001      | 0.78      | 0.41        | 0.0063             | <0.0001                    | <0.0001 |
| Crohn's disease        | 0.0305                | <0.0001      | 0.22    | 0.77         | 0.37      | 0.93        | 0.48               | <0.0001                    | 0.0230  |
| RA                     | 0.0497                | <0.0001      | 0.08    | <0.0001      | 0.0017    | 0.0452      | <0.0001            | <0.0001                    | 0.14    |
| Schizophrenia          | 0.1158                | <0.0001      | 0.0173  | 0.0043       | 0.21      | 0.91        | <0.0001            | <0.0001                    | 0.23    |
| MS                     | 0.0290                | 0.0628       | 0.06    | 0.08         | 0.23      | 0.45        | 0.25               | 0.053                      | 0.80    |
| Epilepsy               | 0.0300                | 0.0023       | 0.90    | 0.76         | 0.61      | 0.73        | 0.43               | 0.0042                     | 0.0082  |
| Cancers                |                       |              |         |              |           |             |                    |                            |         |
| Breast                 | 0.1026                | <0.0001      | <0.0001 | 0.63         | 0.77      | 0.40        | 0.54               | 0.0090                     | <0.0001 |
| Prostate               | 0.2108                | <0.0001      | NA      | <0.0001      | 0.0389    | 0.15        | 0.71               | 0.0150                     | <0.0001 |
| Melanoma               | 0.0393                | <0.0001      | 0.49    | <0.0001      | 0.14      | 0.54        | 0.0047             | <0.0001                    | <0.0001 |
| Colon                  | 0.1251                | <0.0001      | 0.0017  | 0.09         | 0.72      | 0.17        | 0.18               | <0.0001                    | <0.0001 |
| Non-Hodgkin's lymphoma | 0.1631                | <0.0001      | 0.0152  | 0.91         | 0.32      | 0.08        | 0.15               | 0.0002                     | <0.0001 |
| Lung                   | 0.1134                | <0.0001      | 0.13    | 0.21         | 0.0089    | 0.34        | 0.39               | 0.0013                     | <0.0001 |
| Bladder                | 0.0923                | <0.0001      | 0.73    | 0.06         | 0.98      | 0.93        | 0.84               | 0.14                       | <0.0001 |
| Thyroid                | 0.1140                | 0.0001       | 0.32    | 0.23         | 0.84      | 0.13        | 0.41               | 0.0074                     | <0.0001 |
| Kidney                 | 0.0998                | <0.0001      | 0.92    | 0.26         | 0.78      | 0.051       | 0.53               | 0.06                       | <0.0001 |

p: probabilities; COPD: Chronic obstructive pulmonary disease; IBS: Irritable bowel syndrome; MS: Multiple sclerosis; MI: Myocardial infarction; OA: Osteoarthritis; RA: Rheumatoid arthritis; SLE: Systemic lupus erythematosus; CCI: Charlson comorbidity index; NA: no model possible.

Fig. 1 Selected co-factor effects of agreement between diseases.

## A) Sex effect: women versus men

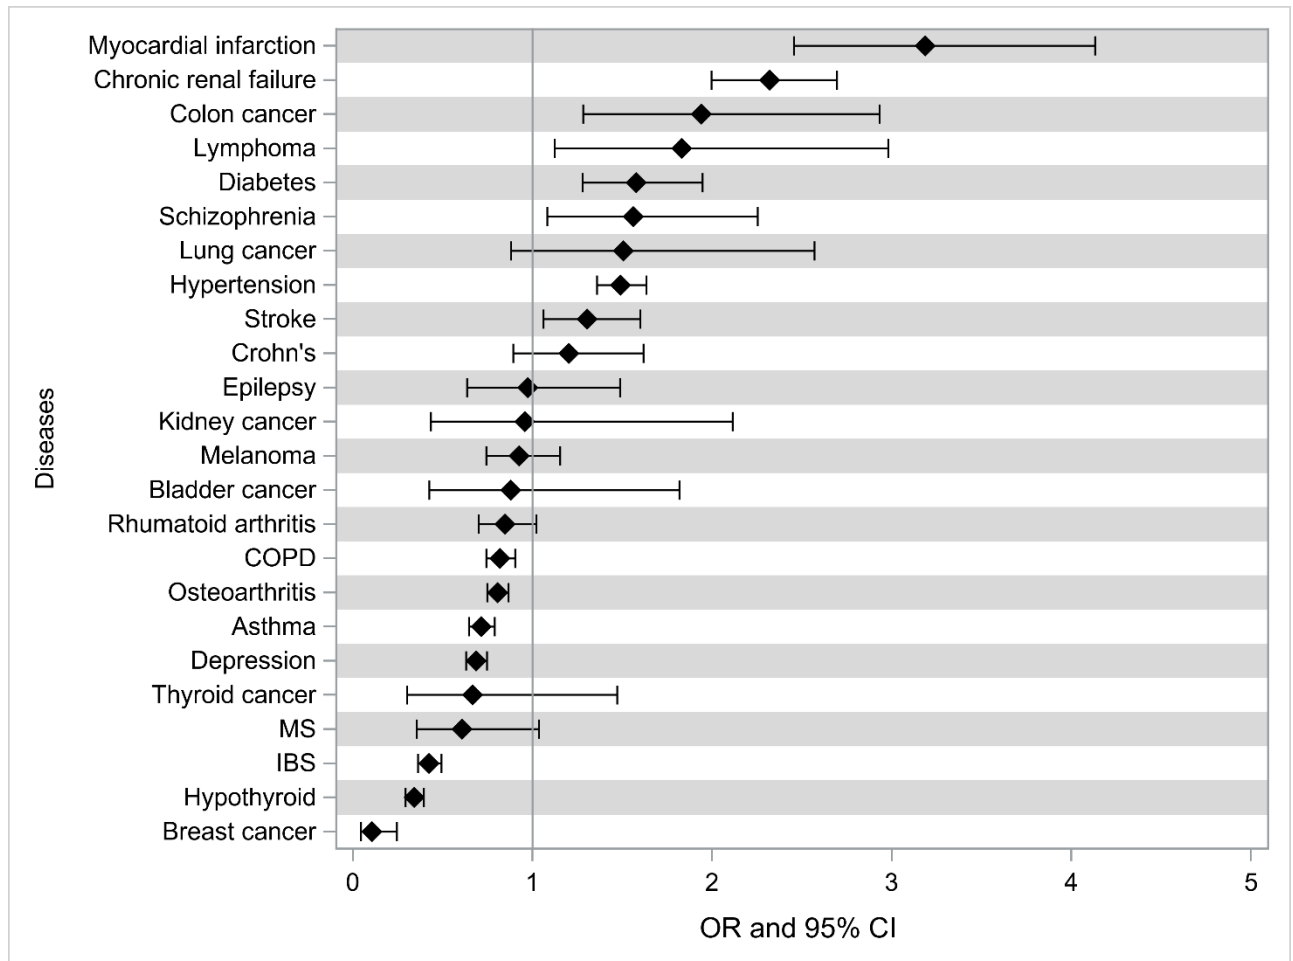

OR greater than 1 means that agreement is stronger in women compared to men.

COPD: Chronic obstructive pulmonary disease; IBS: Irritable bowel syndrome; MS: Multiple sclerosis; Lymphoma: Non Hodgkin's lymphoma; SLE: Systemic lupus erythematosus.

## B) Health care utilization effect: heavy vs. light users

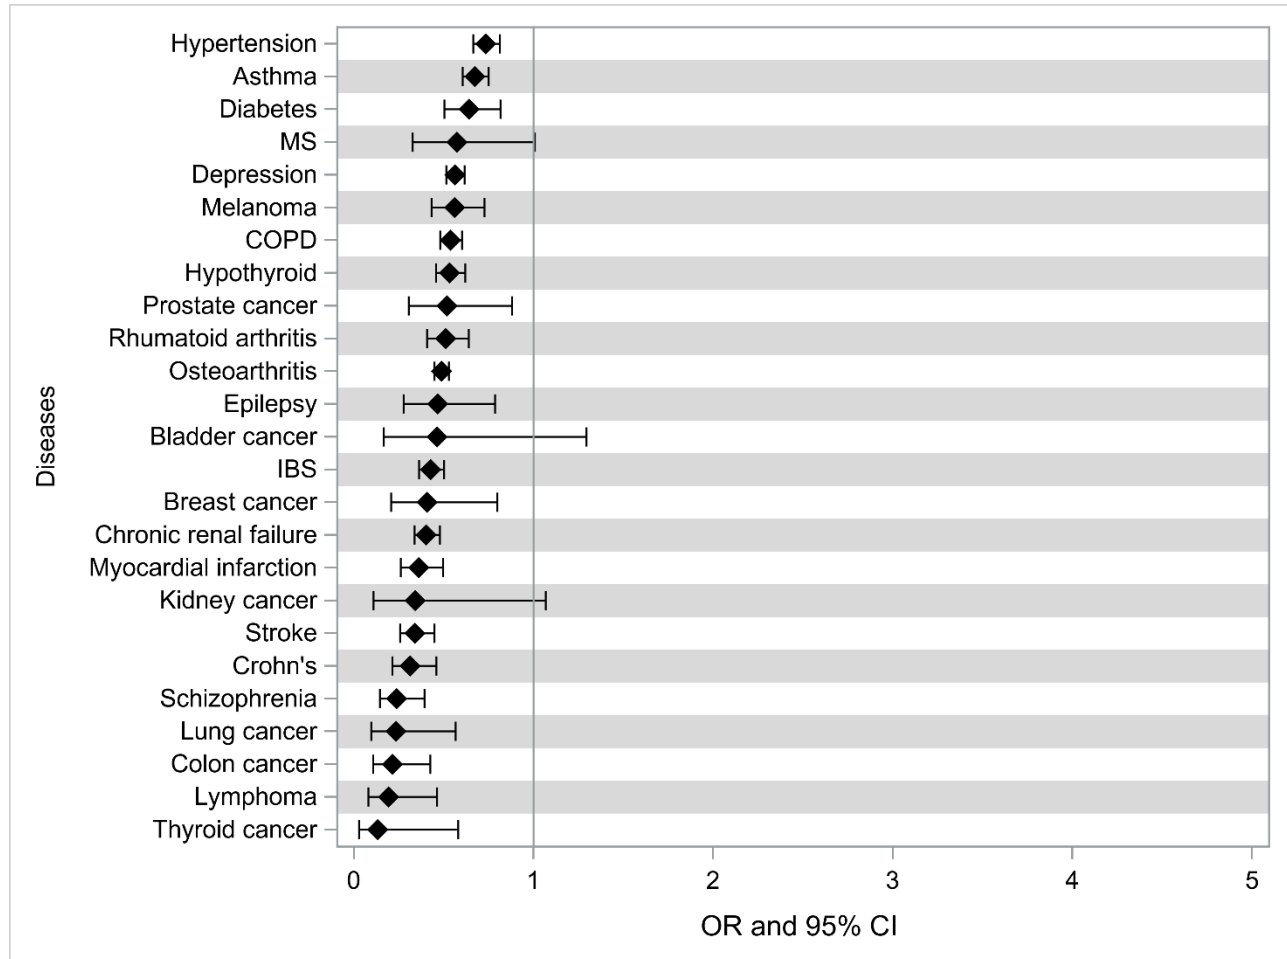

OR greater than 1 means that agreement is stronger in heavy health care users compared to light users.  
 COPD: Chronic obstructive pulmonary disease; IBS: Irritable bowel syndrome; MS: Multiple sclerosis;  
 Lymphoma: Non Hodgkin's lymphoma; SLE: Systemic lupus erythematosus.

C) Comorbidity effect: increase in one unit of the Charlson comorbidity index

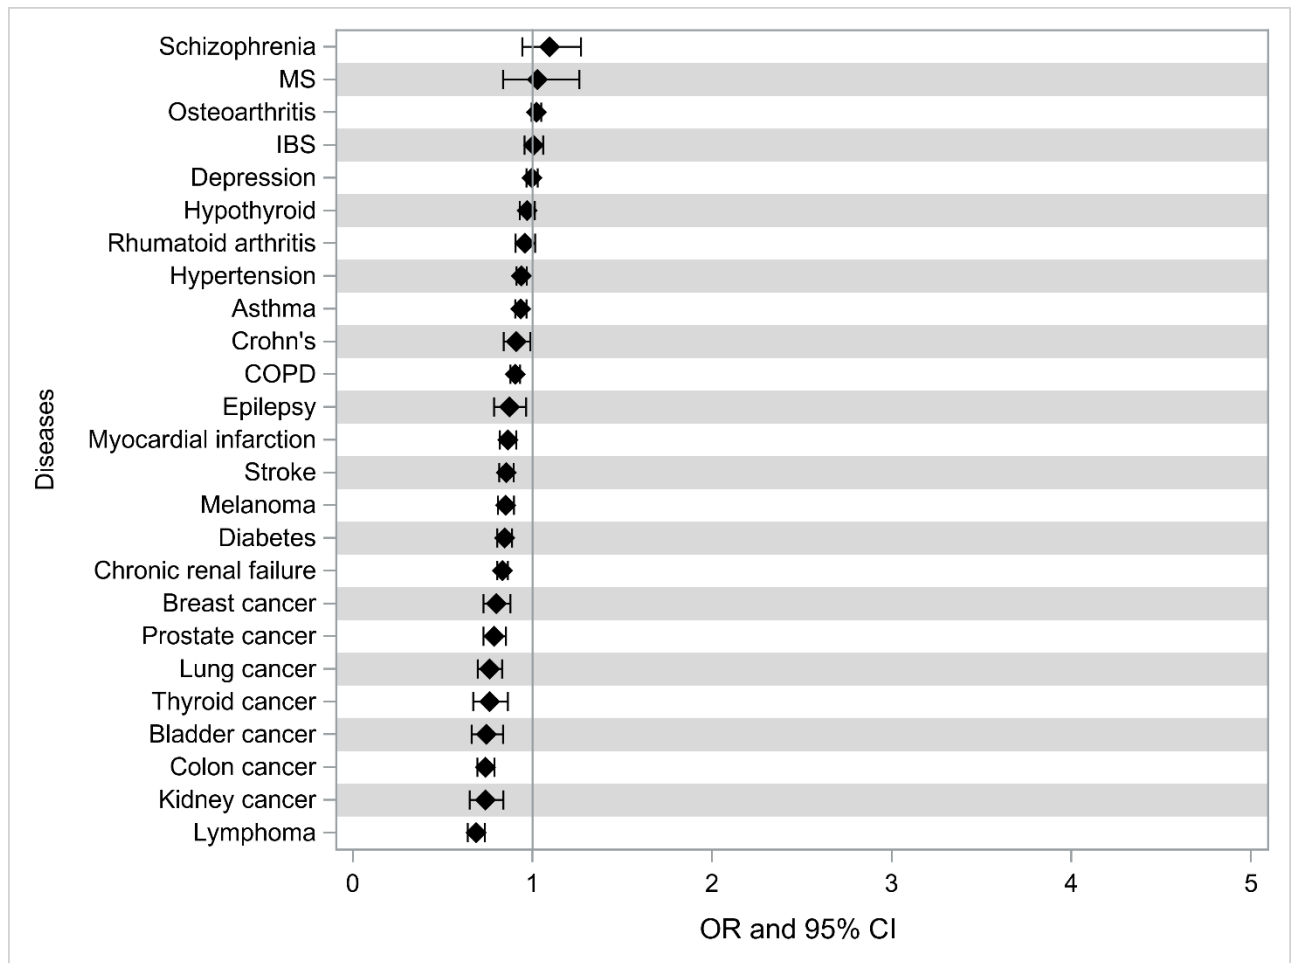

OR greater than 1 means that agreement is stronger for each unit increase of the Charlson comorbidity index.

COPD: Chronic obstructive pulmonary disease; IBS: Irritable bowel syndrome; MS: Multiple sclerosis; Lymphoma: Non Hodgkin's lymphoma; SLE: Systemic lupus erythematosus.

## D) Older age effect: 60-69 years old versus 40-49 years old

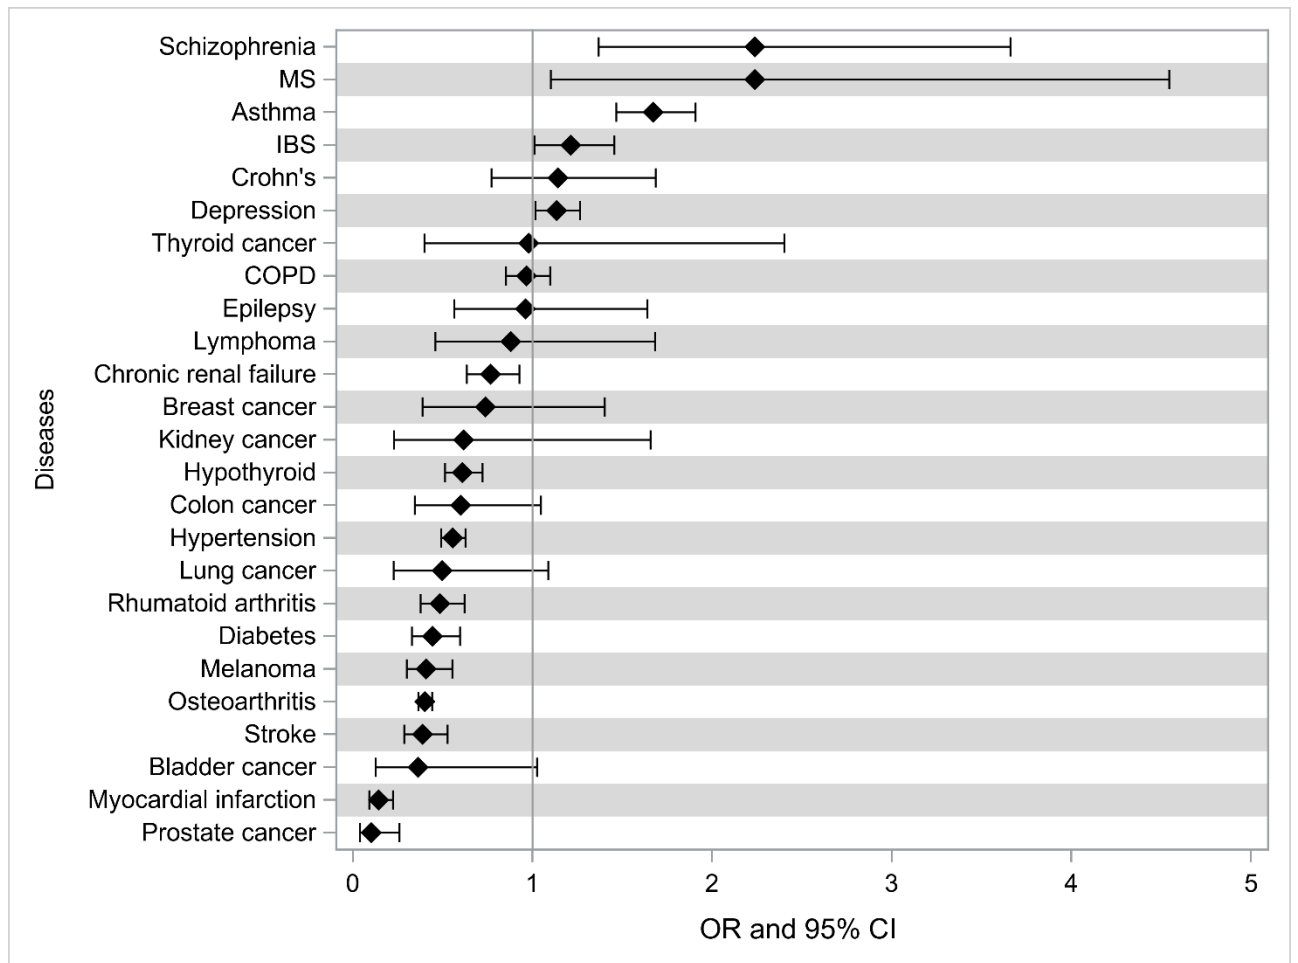

OR greater than 1 means that agreement is stronger in older participants compared to the younger ones. COPD: Chronic obstructive pulmonary disease; IBS: Irritable bowel syndrome; MS: Multiple sclerosis; Lymphoma: Non Hodgkin's lymphoma; SLE: Systemic lupus erythematosus.



## E) Income effect: highest versus lowest income quintiles

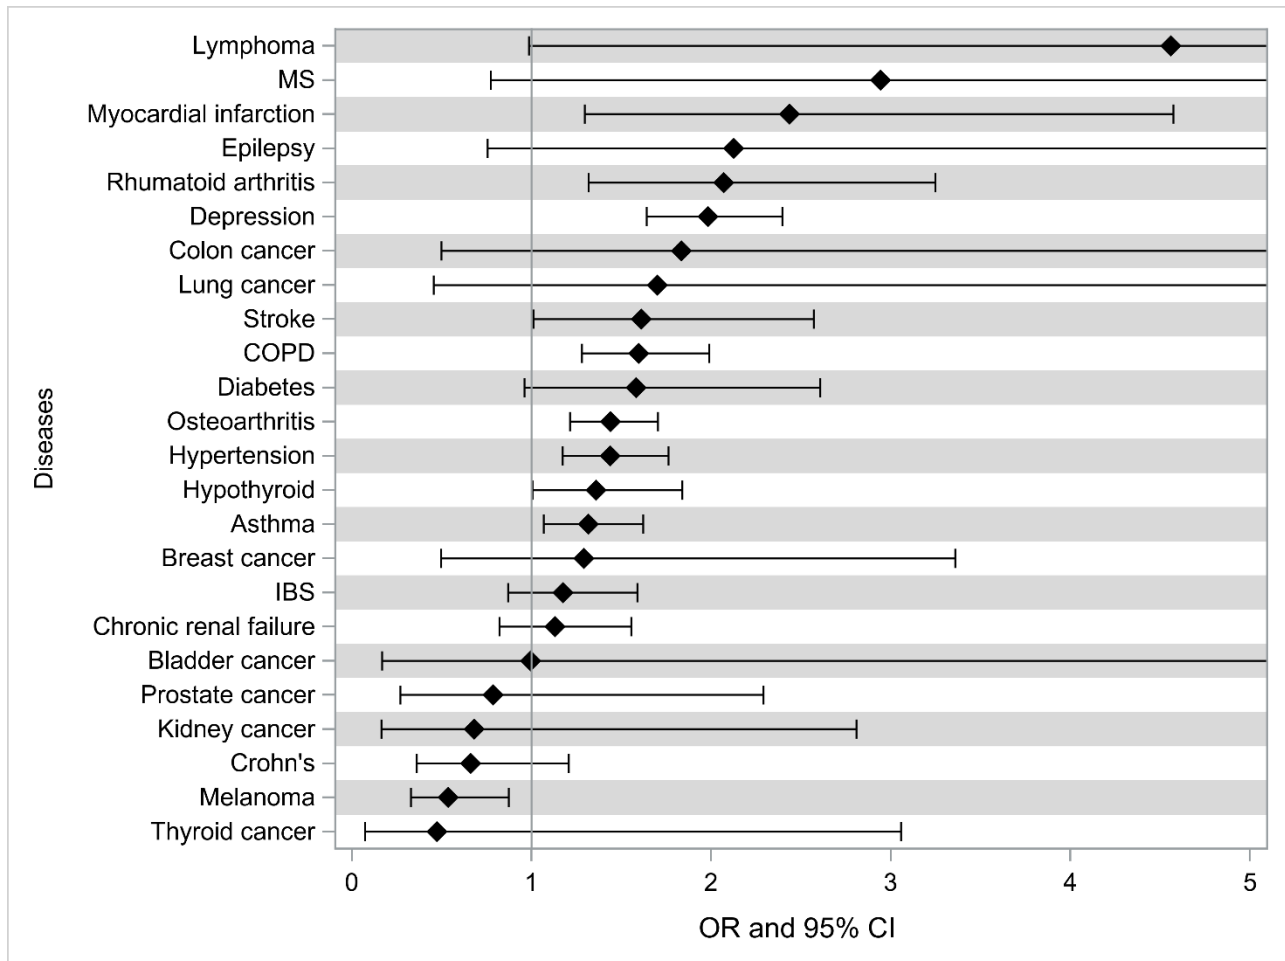

OR greater than 1 means that agreement is stronger in the highest quintile group compared to the lowest. COPD: Chronic obstructive pulmonary disease; IBS: Irritable bowel syndrome; MS: Multiple sclerosis; Lymphoma: Non Hodgkin's lymphoma; SLE: Systemic lupus erythematosus.

**APPENDIX A** -List of selected conditions/morbidities, the self-reported survey questions used to access them, as well as the specific algorithm and ICD codes used on MED-ÉCHO administrative health data <sup>a</sup>.

| Disease                                                   | Self-reported survey question                                                                                                                                                                                  | Administrative health database algorithm                                                 | ICD-9 relevant codes                               | ICD-10 relevant codes                                        |
|-----------------------------------------------------------|----------------------------------------------------------------------------------------------------------------------------------------------------------------------------------------------------------------|------------------------------------------------------------------------------------------|----------------------------------------------------|--------------------------------------------------------------|
| Asthma                                                    | Has a doctor ever told you that you had asthma?                                                                                                                                                                | 1 hospitalization or 3 physician claims in 2 years or less                               | 493                                                | J45                                                          |
| Chronic renal failure                                     | Has a doctor ever told you that had kidney disease such as renal failure, renal infection or a kidney stones?<br>What type of renal failure was it?                                                            | 1 hospitalization or 3 claims in 1 year                                                  | 583, 584, 585, 586, 592, 593.9                     | N00-N23                                                      |
| Cirrhosis <sup>b</sup>                                    | Has a doctor ever told you that you had a liver disorder such as cirrhosis or chronic hepatitis?<br>What kind of liver disorder was it?                                                                        | 1 hospitalization or 1 physician claim                                                   | 571.2, 571.5, 571.6                                | K70.3, K74.3<br>K74.4, K74.5,<br>K74.6                       |
| Chronic obstructive pulmonary disease (COPD) <sup>c</sup> | Has a doctor ever told you that you had chronic bronchitis?                                                                                                                                                    | 1 hospitalization or 2 physician claims in 2 years or less                               | 416.8, 416.9, 490–92, 494–505, 506.4, 508.1, 508.8 | I27.8, I27.9, J40–J44, J46–J47, J60–J67, J68.4, J70.1, J70.3 |
| Crohn's disease <sup>d</sup>                              | Has a doctor ever told you that you suffer from a bowel disorder such as Crohn's Disease, Ulcerative colitis, Irritable bowel syndrome, polyps or diverticular disease?<br>What kind of bowel disorder was it? | 2 hospitalizations or 2 physician claims in 3 years or less                              | 555                                                | K50                                                          |
| Depression                                                | Has a doctor ever told you that you had depression?                                                                                                                                                            | 1 hospitalization or 2 physician claims in 2 years or less                               | 296.2, 296.3, 296.5, 300.4, 309, 311               | F20.4, F31.3–F31.5, F32, F33, F34.1, F41.2, F43.2            |
| Diabetes                                                  | Has a doctor ever told you that you had diabetes?                                                                                                                                                              | 1 hospitalization or 2 physician claims in 3 years or less, exclude gestational diabetes | 250                                                | E10–E14                                                      |
| Epilepsy                                                  | Has a doctor ever told you that you had a neurological condition or migraines?<br>What type of neurological condition was this?                                                                                | 1 hospitalization or 2 physician claims in 2 years or less                               | 345                                                | G40–G41                                                      |

|                                    |                                                                                                                                                                                                                |                                                                                              |                               |                      |
|------------------------------------|----------------------------------------------------------------------------------------------------------------------------------------------------------------------------------------------------------------|----------------------------------------------------------------------------------------------|-------------------------------|----------------------|
| Hypertension                       | Has a doctor ever told you that you had high blood pressure or hypertension, other than high blood pressure occurring only in pregnancy?                                                                       | 1 hospitalization or 2 physician claims in 3 years or less, exclude gestational hypertension | 401-405                       | I10-I13, I15         |
| Hypothyroidism                     | Has a doctor ever told you that you had thyroid disease?<br>Is (or was) it hyperthyroidism or hypothyroidism?                                                                                                  | 1 hospitalization or 2 physician claims in 2 years or less                                   | 240.9, 243, 244, 246.1, 246.8 | E00–E03, E89.0       |
| Irritable bowel syndrome (IBS)     | Has a doctor ever told you that you suffer from a bowel disorder such as Crohn's Disease, Ulcerative colitis, Irritable bowel syndrome, polyps or diverticular disease?<br>What kind of bowel disorder was it? | 1 hospitalization or 2 physician claims in 2 years or less                                   | 564.1                         | K58                  |
| Multiple sclerosis (MS)            | Has a doctor ever told you that you had a neurological condition or migraines?<br>What type of neurological condition was this?                                                                                | 2 hospitalizations or 2 physician claims in 3 years or less                                  | 323, 340, 341.0, 341.9, 377.3 | G35, G36, G37, H46   |
| Myocardial infarction (MI)         | Has a doctor ever told you that you have had a myocardial infarction or a heart attack?                                                                                                                        | 1 hospitalization                                                                            | 410                           | I21-I22              |
| Osteoarthritis (OA)                | Has a doctor ever told you that you had arthritis?<br>What kind of arthritis is (or was) it?                                                                                                                   | 1 hospitalization or 1 physician claim in 2 years or less                                    | 715                           | M15-M19              |
| Parkinson's disease                | Has a doctor ever told you that you had a neurological condition or migraines?<br>What type of neurological condition was this?                                                                                | 1 hospitalization or 2 physician claims in 2 years or less                                   | 332                           | G20, G21, G22        |
| Rheumatoid arthritis (RA)          | Has a doctor ever told you that you had arthritis?<br>What kind of arthritis is (or was) it?                                                                                                                   | 1 hospitalization or 3 physician claims, one by rheumatologist, in 2 years or less           | 714                           | M05-M06              |
| Schizophrenia                      | Has a doctor ever told you that you had Schizophrenia?                                                                                                                                                         | 1 hospitalization or 2 physician claims in 2 years or less                                   | 295                           | F20, F21, F23.2, F25 |
| Systemic lupus erythematosus (SLE) | Has a doctor ever told you that you suffer from systemic lupus erythematosus, often called SLE or "Lupus"?                                                                                                     | 1 hospitalization or 3 physician claims, one by rheumatologist, in 2 years or less           | 710                           | M32                  |

|                 |                                                                                                                                      |                                                            |                                   |                    |
|-----------------|--------------------------------------------------------------------------------------------------------------------------------------|------------------------------------------------------------|-----------------------------------|--------------------|
| Stroke          | Has a doctor ever told you that you have had a stroke?                                                                               | 1 hospitalization or 1 physician claim                     | 430, 431, 433.x1, 434.x1, 435,436 | I60, I61, I63, I64 |
| Bladder cancer  | Has a doctor ever told you that you had cancer or a malignancy of any kind?<br>What type of cancer or malignancy of any kind was it? | 1 hospitalization or 2 physician claims in 2 years or less | 188, 233.7                        | C67, D09.0         |
| Breast cancer   | Has a doctor ever told you that you had cancer or a malignancy of any kind?<br>What type of cancer or malignancy of any kind was it? | 1 hospitalization or 2 physician claims in 2 years or less | 174, 233.0                        | C50, D05           |
| Cervical cancer | Has a doctor ever told you that you had cancer or a malignancy of any kind?<br>What type of cancer or malignancy of any kind was it? | 1 hospitalization or 2 physician claims in 2 years or less | 180, 233.1                        | C53 D06            |
| Uterine cancer  | Has a doctor ever told you that you had cancer or a malignancy of any kind?<br>What type of cancer or malignancy of any kind was it? | 1 hospitalization or 2 physician claims in 2 years or less | 182, 233.2                        | C55                |
| Prostate cancer | Has a doctor ever told you that you had cancer or a malignancy of any kind?<br>What type of cancer or malignancy of any kind was it? | 1 hospitalization or 2 physician claims in 2 years or less | 185, 233.4                        | C61, D07.5         |
| Colon cancer    | Has a doctor ever told you that you had cancer or a malignancy of any kind?<br>What type of cancer or malignancy of any kind was it? | 1 hospitalization or 2 physician claims in 2 years or less | 153, 230.3                        | C18                |
| Rectum cancer   | Has a doctor ever told you that you had cancer or a malignancy of any kind?<br>What type of cancer or malignancy of any kind was it? | 1 hospitalization or 2 physician claims in 2 years or less | 154, 230.4-230.6                  | C19-C21            |
| Kidney cancer   | Has a doctor ever told you that you had cancer or a malignancy of any kind?<br>What type of cancer or malignancy of any kind was it? | 1 hospitalization or 2 physician claims in 2 years or less | 189.0                             | C64                |

|                        |                                                                                                                                      |                                                            |                        |                                 |
|------------------------|--------------------------------------------------------------------------------------------------------------------------------------|------------------------------------------------------------|------------------------|---------------------------------|
| Lung cancer            | Has a doctor ever told you that you had cancer or a malignancy of any kind?<br>What type of cancer or malignancy of any kind was it? | 1 hospitalization or 2 physician claims in 2 years or less | C34, C38.4             | 162.2-162.9 163<br>231.2        |
| Trachea cancer         | Has a doctor ever told you that you had cancer or a malignancy of any kind?<br>What type of cancer or malignancy of any kind was it? | 1 hospitalization or 2 physician claims in 2 years or less | 162.0                  | C33                             |
| Non-Hodgkin's lymphoma | Has a doctor ever told you that you had cancer or a malignancy of any kind?<br>What type of cancer or malignancy of any kind was it? | 1 hospitalization or 2 physician claims in 2 years or less | 200, 202, 203.0, 238.6 | C82–C85, C88, C90.0, C90.2, C96 |
| Melanoma               | Has a doctor ever told you that you had cancer or a malignancy of any kind?<br>What type of cancer or malignancy of any kind was it? | 1 hospitalization or 2 physician claims in 2 years or less | 172, 232               | C43, D03                        |
| Thyroid cancer         | Has a doctor ever told you that you had cancer or a malignancy of any kind?<br>What type of cancer or malignancy of any kind was it? | 1 hospitalization or 2 physician claims in 2 years or less | 193                    | C73, D09.3                      |

<sup>a</sup> Adapted from Quan *et al.* (2005)[[34](#)] and Tonelli *et al.* (2015)[[35](#)]

<sup>b</sup> Includes alcohol misuse and cirrhosis (571.2, K70.3).

<sup>c</sup> Combination of chronic bronchitis and emphysema.

<sup>d</sup> Original algorithm also includes other type inflammatory bowel disease. ICD codes were restricted to Crohn's disease
